1 **pH-dependent  $11^\circ$   $F_1F_0$  ATP synthase sub-steps reveal insight into the  $F_0$  torque generating**  
2 **mechanism**

3  
4 **Authors**

5 Seiga Yanagisawa<sup>1</sup>, Wayne D. Frasch<sup>1\*</sup>

6  
7  
8 **Affiliations**

9 <sup>1</sup>School of Life Sciences, Arizona State University, P.O. Box 874501, Tempe, AZ 85287-4501

10  
11 \*Corresponding Author to whom Correspondence should be addressed

12 email: [frasch@asu.edu](mailto:frasch@asu.edu)

13 ORCID ID: 0000-0001-6590-7437

14 TEL: 480-965-8663

15  
16  
17  
18

## 19 **Abstract**

20 Most cellular ATP is made by rotary  $F_1F_0$  ATP synthases using proton translocation-generated  
21 clockwise torque on the  $F_0$  c-ring rotor, while  $F_1$ -ATP hydrolysis can force anticlockwise rotation  
22 and proton pumping. Although the interface of stator subunit-a containing the transmembrane  
23 half-channels and the c-ring is known from recent  $F_1F_0$  structures, the torque generating  
24 mechanism remains elusive. Here, single-molecule studies reveal pH-dependent  $11^\circ$  rotational  
25 sub-steps in the ATP synthase direction of the *E. coli*  $c_{10}$ -ring of  $F_1F_0$  against the force of  $F_1$ -  
26 ATPase-dependent rotation that result from  $H^+$  transfer events from  $F_0$  subunit-a groups with a  
27 low pKa to one c-subunit of the c-ring, and from an adjacent c-subunit to stator groups with a  
28 high pKa. Mutations of subunit-a residues in the proton translocation channels alter these pKa  
29 values, and the ability of synthase substeps to occur. Alternating  $11^\circ$  and  $25^\circ$  sub-steps then result  
30 in sustained ATP synthase rotation of the  $c_{10}$ -ring.

31

32

## 33 **Introduction**

34 The  $F_1F_0$  ATP synthase (**Fig 1**) that is found in all animals, plants, and eubacteria is  
35 comprised of two molecular motors that are attached by their rotors, and by their stators (1,2). The  
36  $F_0$  motor, which is embedded in bioenergetic membranes, uses a nonequilibrium transmembrane  
37 chemiosmotic proton gradient also known as a proton-motive force (pmf) to power clockwise  
38 (CW) rotation of its ring of c-subunits relative to the stator proteins as viewed from the *E. coli*  
39 periplasm. The c-ring docks to subunits- $\gamma$  and  $\epsilon$  of  $F_1$ . Subunit- $\gamma$ , which serves as the drive shaft  
40 for  $F_1$ , penetrates into the core of the  $F_1$  ( $\alpha\beta$ )<sub>3</sub>-subunit ring (**Fig 1B**) where each  $\alpha\beta$ -heterodimer  
41 comprises a catalytic site that synthesizes ATP from ADP and Pi.

42 Due to the staggered conformations of the three  $F_1$  catalytic sites, Site-1 contains ADP and Pi,  
43 and Site-2 contains ATP. Pmf-powered CW rotation of subunit- $\gamma$  forces conformational changes  
44 to all catalytic sites in the ( $\alpha\beta$ )<sub>3</sub>-ring, which releases ATP from Site-3 to create an empty site with  
45 each  $120^\circ$  rotational step (1,2). In this manner,  $F_1F_0$  converts the energy from the pmf into a non-  
46 equilibrium chemical gradient ( $\Delta\mu_{ATP}$ ) where the ATP/ADP•Pi concentration ratio is far in  
47 excess of that found at equilibrium. The  $F_1$ -ATPase motor can also use the energy from a  $\Delta\mu_{ATP}$   
48 to overpower the  $F_0$  motor and drive ATPase-dependent counter clockwise (CCW) rotation in  
49  $120^\circ$  power strokes. Power strokes are separated by catalytic dwells, during which ATP is  
50 hydrolyzed (3-5). This rotation is used by  $F_0$  to pump protons across the membrane.

51 The means by which  $H^+$  translocation generates rotational torque on the c-ring is poorly  
52 understood. Maximal ATP synthase rates catalyzed by *E. coli*  $F_1F_0$  ATP synthase are typically  
53 achieved with inner and outer pH values of 5.0 and 8.5, respectively, as measured using inverted  
54 membranes (6,7). Protons enter and exit  $F_0$  via half-channels in stator component subunit-a,  
55 which in *E. coli*  $F_1F_0$ , are separated by conserved arginine aR210 (1,2). During ATP synthesis,  
56 the input and output half-channels protonate and deprotonate, respectively, the carboxyl sidechain  
57 of conserved residue cD61 on each successive c-subunit in the *E. coli*  $c_{10}$ -ring such that each  $H^+$   
58 translocated results in a  $36^\circ$  rotation event.

59 Single-molecule studies revealed that when  $F_1F_0$  is embedded in lipid bilayer nanodiscs (**Fig 1C**),  
60 the  $120^\circ$  CCW power strokes catalyzed by ATP hydrolysis were interrupted by transient dwells  
61 (TDs) at  $\sim 36^\circ$  intervals corresponding to successive interactions between subunit-a and the  $c_{10}$ -  
62 ring. In more than 70% of TDs, the  $F_0$  motor not only halted  $F_1$ -ATPase CCW rotation, but the c-  
63 ring was able to rotate in the CW (ATP synthesis) direction. The occurrence of TDs increased  
64 inversely

65

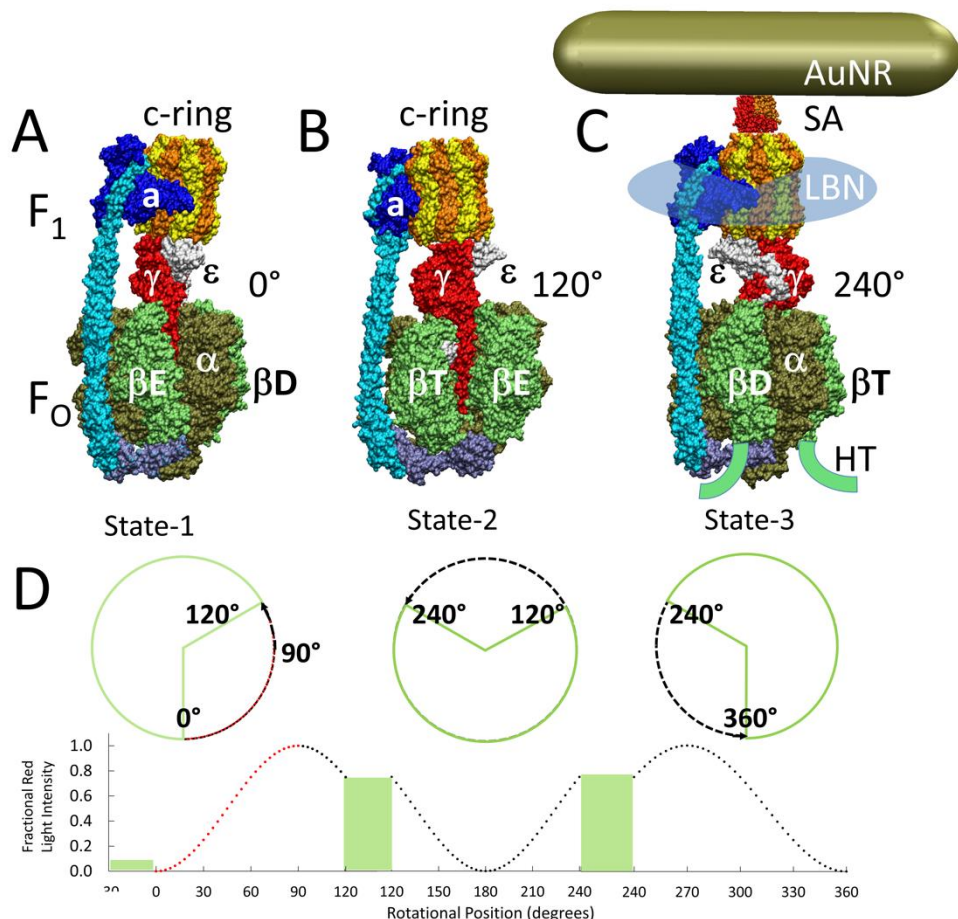

66

67 **Fig. 1. Cryo-EM structures of  $F_1F_0$  ATP synthase inhibited by ADP in three rotary states, and**  
68 **measurement of changes in rotational position between catalytic dwells. A** Rotational State-1, pdb-ID  
69 6OQU (17). **B** State-2, pdb-ID 6OQV, with rotor 120° CCW from **A** where subunit- $\alpha$  is not shown to reveal  
70 subunit- $\gamma$ . **C** State-3, pdb-ID 6WNR, with rotor 240° CCW from **A** showing microscope slide assembly of  
71 nanodisc-embedded  $F_1F_0$  for rotation measurements. His<sub>6</sub>-tags on  $\beta$ -subunit C-termini enabled attachment to  
72 slide, while the streptavidin-coated gold nanorod (AuNR) bound to the biotinylated subunit-c ring. **D** Rotational  
73 position of single  $F_1F_0$  molecules versus time was monitored by intensity changes of polarized red light  
74 scattered from the AuNR in the presence of 1 mM Mg<sup>2+</sup>ATP, which enabled  $F_1$ -ATPase-dependent 120° CCW  
75 power strokes between catalytic dwells. Prior to data collection at 200 kHz, a polarizer in the scattered light  
76 path was rotated to minimize intensity during one of the three catalytic dwells. Light intensity increased to a  
77 maximum upon rotation by 90° during the subsequent CCW 120° power stroke. For each molecule the angular  
78 dependence of these power strokes versus time was analyzed.

79

80 with pH between pH 5 and pH 7 (8), or when viscous drag on the nanorod was sufficient to slow  
81 the angular velocity of the  $F_1$ -ATPase-driven power stroke (9,10).

82 Mutations of subunit-a residues aN214, aE219, aH245, aQ252, and aE196 of *E. coli*  $F_1F_0$   
83 decreased ATP synthase activity, and ATPase-dependent H<sup>+</sup> pumping, supporting their  
84 participation in H<sup>+</sup> translocation (10-13). Formation of TDs observed in single-molecule studies  
85 under viscosity-limited conditions also decreased significantly as the result of aE196 mutations  
86 (10). Although recent cryo-EM structures of  $F_1F_0$  show that these residues are positioned along

87 possible channels (2,14-17), some are not protonatable, and most are separated by distances too  
88 large to form hydrogen bonds.

89 We have now determined the pKa values of TDs in single-molecules of  $F_1F_0$  embedded in a  
90 lipid bilayer nanodiscs. These studies reveal that the CW rotation TDs occurs in pH-dependent  
91  $11^\circ$  ATP synthase sub-steps that depend on  $H^+$  transfer between protonated groups with a low  
92 pKa from the subunit-a input channel to the c-ring, and between the c-ring to unprotonated groups  
93 with a high pKa in subunit-a. Mutations of residues that participate in  $H^+$  translocation in the  
94 input and output channels change both pKa values, and alter the probability of forming  $11^\circ$  ATP  
95 synthase sub-steps. These data support a mechanism where sustained c-ring rotation in the ATP  
96 synthesis direction results from successive alternating  $11^\circ$  and  $25^\circ$  sub-steps for each c-subunit in  
97 the  $c_{10}$ -ring.

## 98 Results

99 Contributions of subunit-a residues putatively involved in the ATP synthase  $H^+$  half-channels  
100 were assessed by the effects on transient dwell formation caused by mutations that converted  
101 charged or polar groups in subunit-a to hydrophobic leucine. Changes in rotational position were  
102 measured by a  $35 \times 75$  nm gold nanorod (AuNR) bound to the biotinylated c-ring of individual *E.*  
103 *coli*  $F_0F_1$  molecules embedded in lipid bilayer nanodiscs (9), hereafter  $F_1F_0$  (**Fig 1C**). Changes in  
104 rotational position during  $F_1$ -ATPase power strokes in the presence of saturating 1 mM MgATP  
105 were monitored by the intensity of polarized red light scattered from the AuNR (18,19). Prior to  
106 data collection, the polarizer was adjusted so that the scattered red light intensity was at a  
107 minimum during one of the three  $F_1$  catalytic dwells (**Figs 1D, 2A**). The subsequent power stroke  
108 caused an increase in light intensity to a maximum when the AuNR had rotated  $90^\circ$  (20).  
109 Rotational data sets of each  $F_1F_0$  molecule examined were collected for 5 sec, which included  
110  $\sim 300$  of these power strokes (8). Ten data sets were collected for each molecule. The number of  
111  $F_1F_0$  molecules examined at each pH for WT and mutants is indicated in Supplementary Figure 3.  
112 Using WT at pH 5.0 as an example where data from 103  $F_1F_0$  molecules were collected, this was  
113 equivalent to 1030 data sets, and  $\sim 309,000$  power strokes examined. For each molecule  
114 examined, rotational position versus time was calculated from scattered light intensity versus time  
115 using an arcsine<sup>1/2</sup> function from which the number of TDs observed during the first  $90^\circ$  of  
116 rotation were determined (21).

117 Examples power strokes from WT and mutant  $F_1F_0$  molecules at pH 5.0 where TDs were  
118 present (●), and absent (●) are shown in Fig 2A and Fig S1. When present, TDs either stopped  
119  $F_1$ -ATPase CCW rotation momentarily (●), or exhibited CW rotation in the ATP synthase  
120 direction, hereafter synthase steps (●). None of the mutations examined eliminated the ability of  
121  $F_1F_0$  to form TDs. Power strokes typically contained 2 to 3 TDs, when present. These were  
122 separated by an average of  $\sim 36^\circ$ , consistent with an interaction between subunit-a and successive  
123 c-subunits in the  $c_{10}$ -ring of *E. coli*  $F_1F_0$ .

### 124 Subunit-a Mutations Alter pKa's of TD Formation.

125 We determined the pKa values of groups that contribute to TD formation (**Fig 2B**) using  
126 equations applied to the pH dependence of enzyme inhibition kinetics (22). Transient dwells  
127 occur when subunit-a binds to the c-ring to stop  $F_1$  ATPase-driven rotation for a period of time.  
128 Thus, a TD represents an extent that  $F_0$  inhibited the  $F_1$ ATPase motor, which occur as often as 3.6  
129 times per  $F_1$  power stroke. Kinetically, the ATPase power stroke duration without TDs is  $\sim 200$   
130  $\mu$ sec, while TDs each last  $\sim 100$   $\mu$ sec (8,9). In data sets where TDs occur in 100% of the power

131 strokes, e.g. aN214L at pH 6.0, this represents a 64% inhibition of the  $F_1$ ATPase power stroke  
 132 kinetics.

133 A maximum average of 47.5% of WT power strokes from all three efficiency groups occurred  
 134 at pH 5.0, which decreased with increasing pH until it plateaued at a minimum of ~22% at pH  
 135 values >7.5 (**Fig 2B**). The pH dependences for WT and mutants were fit to *Eq. 1* where T is the  
 136 total average TD occurrence,  $T_{\min}$  is the minimum TD occurrence, and  $K_1$  and  $K_2$  are the  
 137 inhibition constants that define the increase and maximum TD occurrence versus pH as the result

138

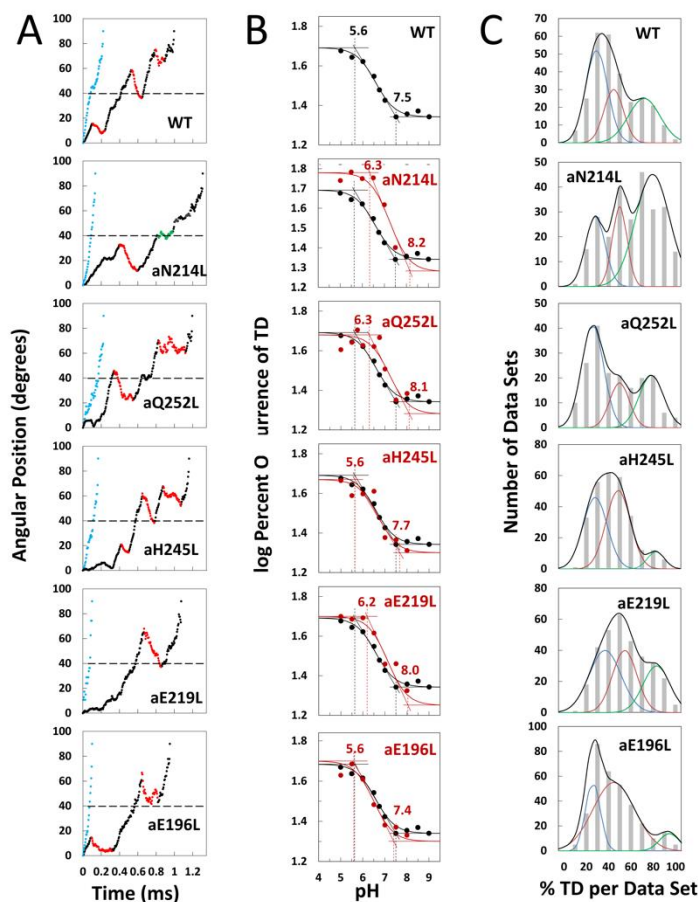

139 **Fig. 2. Effects of subunit-a mutations on Transient Dwells (TDs).** **A** Examples of power strokes without  
 140 transient dwells (●), and of power strokes with transient dwells that lacked (●), or contained CW c-ring  
 141 rotation relative to subunit-a (●) plotted as degrees of rotation after the catalytic dwell vs time where 40° (- - -)  
 142 is the optimal position for binding of ATP or inhibitory ADP (3, 28). **B** Average percent TDs per data set vs pH  
 143 from which pKa values were derived via intercepts of the slope and plateaus (- - -) of each curve based on the  
 144 fit of the data to *Eq. 1* for WT (—), and subunit-a mutants (—). Distribution of the extent of synthase step CW  
 145 rotation at pH values when the percent of synthase steps was minimum (—), and maximum (—). **C**  
 146 Distributions at pH 6.0 of the percent of TDs per data set of power strokes (gray bar graphs) where multiple  
 147 data sets that each Slide2contained ~300 power strokes were collected from each of the total number of the  
 148  $F_1F_0$  indicated, and data were binned in 10 % increments. The data were fit to the sum of three Gaussians (—)  
 149 representing low (—), medium (—), and high (—) efficiencies of TD formation.  
 150

151

152 of either a residue that is protonated with  $pK_{a1}$ , or unprotonated with  $pK_{a2}$ , respectively. It is  
 153 noteworthy that  $K_1$  is similar to a dissociation constant because a smaller  $K_1$  increases the ability

154 of subunit-a to bind to, and stop c-ring rotation with decreasing pH (**Fig S2**). Conversely, a  
 155 smaller  $K_2$  value decreases TD formation with decreasing pH because it is the unprotonated form  
 156 of that residue that binds and inhibits.

$$157 \quad T = \log T_{\min} - \log \left( 1 + \frac{K_1}{[H^+]} \right) + \log \left( 1 + \frac{K_2}{[H^+]} \right) \quad \text{Eq. 1}$$

158 The fit of the data to *Eq. 1* defines the slope of the curve as well as the high and low plateau  
 159 values. Because these are log-log plots, the pKa values (**Fig 2B**, - - -) are determined by the  
 160 intercept of the slope with the high and low plateau values (—). None of the mutations changed  
 161  $T_{\min}$  significantly. Using parameters derived by the fits of the data to *Eq. 1* for WT and mutants  
 162 (**Table 1**), the WT group(s) that must be protonated to induce a TD had pKa<sub>1</sub> and K<sub>1</sub> of 5.6, and  
 163 6.4, respectively, while the group(s) that must be unprotonated to induce a TD had pKa<sub>2</sub> and K<sub>2</sub>  
 164 values of 7.5 and 6.75.

165

166 **Table 1. pKa values and inhibition constants for WT and subunit-a mutants.** Values were derived from the  
 167 fits to *Eq. 1* of the average percent of TDs per data set vs pH in Fig 2C.

|        | $K_1$ | $K_2$ | $T_{\min}$ (%) | pKa <sub>1</sub> | pKa <sub>2</sub> |
|--------|-------|-------|----------------|------------------|------------------|
| WT     | 6.4   | 6.75  | 22.0           | 5.6              | 7.5              |
| aN214L | 7.0   | 7.50  | 19.1           | 6.3              | 8.2              |
| aQ252L | 7.0   | 7.40  | 19.5           | 6.3              | 8.1              |
| aE219L | 6.9   | 7.35  | 17.8           | 6.2              | 8.0              |
| aH245L | 6.5   | 6.87  | 20.0           | 5.6              | 7.7              |
| aE196L | 6.3   | 6.70  | 20.0           | 5.6              | 7.4              |

168

169

170 The aN214L mutation, which had the greatest effect on the pH dependence of TD formation,  
 171 increased the maximum percent of TDs formed at low pH to 61% (1.3-fold), and shifted the pH  
 172 dependence in the alkaline direction from WT. These changes were due to increases in K<sub>1</sub> and K<sub>2</sub>  
 173 to 6.4 and 6.75, respectively, that increased pKa<sub>1</sub> and pKa<sub>2</sub> by 0.9 and 0.7 pH units. The  
 174 differential increases in K<sub>1</sub> and K<sub>2</sub> by 0.6 and 0.75 units led to the aN214L-dependent increase in  
 175 maximum TD formation at low pH because an equal shift of these values in the same direction  
 176 causes the curve to shift to higher pH values without affecting the maximum occurrence of TDs  
 177 formed (**Fig S2**). Similar but smaller effects were observed with aQ252L, and aE219L (**Fig 2B**)  
 178 where K<sub>1</sub> increased by 0.6 and 0.5 units, respectively, resulting in an pKa<sub>1</sub> increase of almost 1  
 179 pH unit from that of WT. However, aQ252L, and aE219L decreased K<sub>2</sub> by 0.35 and 0.40 units  
 180 from WT such that the increase in pKa<sub>2</sub> was proportionally smaller than that observed for  
 181 aN214L. Consequently, while both mutants shifted the pH dependence in the alkaline direction  
 182 from that of WT, only aQ252L showed an increase in the maximum TD occurrence (52%).

183 Mutations aH245L and aE196L caused the smallest changes on the pH dependence of TD  
 184 formation. The former increased K<sub>1</sub> and K<sub>2</sub> by 0.1 and 0.12 units, which had no effect on pKa<sub>1</sub>,  
 185 and increased pKa<sub>2</sub> by 0.2 units. The latter was the only mutation to decrease the values of both  
 186 K<sub>1</sub> and K<sub>2</sub>, which decreased pKa<sub>2</sub> by 0.1 pH units from that of WT. It is noteworthy that aE196 is  
 187 a component of the H<sup>+</sup> output channel.

### 188 *Subunit-a Mutations Affect TD Formation Efficiency.*

189 The percent of TDs observed per data set fit to three Gaussian distributions with low (—),  
 190 medium (—), and high (—) efficiencies as shown at pH 6.0 (**Fig 2C**), and at all pH values  
 191 examined (**Fig S3**). Subunit-a mutations affected the percent of TDs formed per data set during  
 192 power strokes in each of these efficiencies, which correlate to the three rotary positions of the  
 193 central stalk relative to the peripheral stalk (8). The proportional differences of efficiencies of TD

194 formation is shown relative to the average low efficiency for WT (**Fig 3**). Medium and high  
195 efficiency distributions of TDs in WT increased 1.5-fold and 2.2-fold, respectively, relative to low  
196 efficiency. The aN214L mutation increased the percent of TDs per data set for high, medium, and  
197 low efficiencies by 3-fold, 2-fold, and 1.2-fold, respectively, from the WT low efficiency.  
198 Mutations aQ252L and aE219L also increased TDs per data set for the high (2.7-fold and 2.5-  
199 fold), and medium (1.7-fold and 1.6-fold), but not the low efficiency distributions. Mutations  
200 aH245L and aE196L either did not increase the efficiency or slightly decreased the efficiency of  
201 the distributions of TD formation per data set.

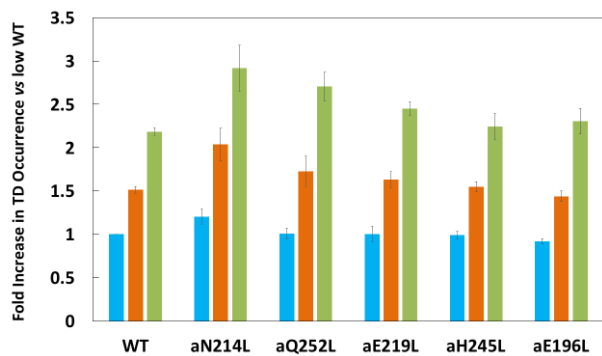

202

203 **Fig. 3. Proportion of low (—), medium (—), and high (—) TD formation efficiencies relative to WT low**  
204 **efficiency TD formation.** Each was the average of all pH values examined. Vertical bars represent standard  
205 error.

206

207 *Synthase Steps Rotate CW an Average of ~11°.*

208 The proportion of TDs with and without a synthase step for WT and mutants are shown in **Fig**  
209 **4A** at the pH values when the proportion of synthase steps was minimum (**I**) and maximum (**I**),  
210 and at all pH values examined in Fig S4. The minimum proportion of synthase steps was observed  
211 at pH 5.5 for WT and all mutants except aN214L that occurred at pH 6.0. Even at this low pH  
212 values, synthase steps accounted for 62% - 68% of all TDs. In WT, a maximum of ~80% of TDs  
213 contained synthase steps at pH 7.0, which was an increase of 13% from the minimum. These plots  
214 also show the distributions of the extent of CW rotation during a synthase step, for which the 11°  
215 and 9° average and median values of CW rotation, respectively, were not changed significantly by  
216 the mutations (**Fig 4B**).

217

218 After subtracting the occurrence of the extent of synthase step CW rotation at the pH when it  
219 was at a minimum (**I**) from that observed at other pH values (**Fig S4**) including that at its  
220 maximum (**I**), a Gaussian distribution of the increase in the extent of synthase step CW rotation  
221 was observed (**Fig 4C**). During a synthase step, the mean and standard deviations in the extent of  
222 CW rotation was  $12^\circ \pm 3^\circ$  for WT, with little variation resulting from the mutations including:  $11^\circ \pm 3^\circ$   
223 ( $11^\circ \pm 3^\circ$  (aN214L),  $11^\circ \pm 4^\circ$  (aQ252L),  $11^\circ \pm 3^\circ$  (aH245L),  $10^\circ \pm 3^\circ$  (aE219L), and  $11^\circ \pm 3^\circ$   
224 (aE196L). In all cases, the distributions were truncated with minimum CW rotational steps of 6°.  
225 At their maxima, the extents of CW c-ring rotation during synthase events rotated 24° and 36°  
about 1% and 0.1% of the time, respectively.

226

227 *Subunit-a Mutations Affect the Proportion of TDs with Synthase Steps.*

228 The subset of TDs that forced the c-ring to rotate CW (synthase steps) against the CCW force  
of F<sub>1</sub>-ATPase rotation was pH dependent (**Fig 4D**). A maximum of 80% of TDs contained

synthase steps in WT at ~pH 7.3, and a minimum of 67% at pH 5.5. At pH values >7.5, the proportion of synthase steps decreased to 71% at pH 9.0.

Because a TD either contains ( $T_S$ ) or lacks ( $T_N$ ) a synthase step, the pH dependence of TDs with a synthase step (**Fig 4D**) was the inverse of that without a synthase step (**Fig 4E**) per *Eq. 2*.

$$T_S = 1 - T_N \quad \text{Eq. 2}$$

For WT, the minimum  $T_N$  of 20% at pH 7.5 increased 1.7-fold at pH 5.5, and also increase 1.5-fold and pH 9.0. At these extremes of low and high pH values, TD formation was dominated by groups where either  $pK_{a1}$  is protonated, or by unprotonated groups with  $pK_2$ . This conclusion is supported by the good fits of the pH dependencies of TDs without synthase steps for WT and

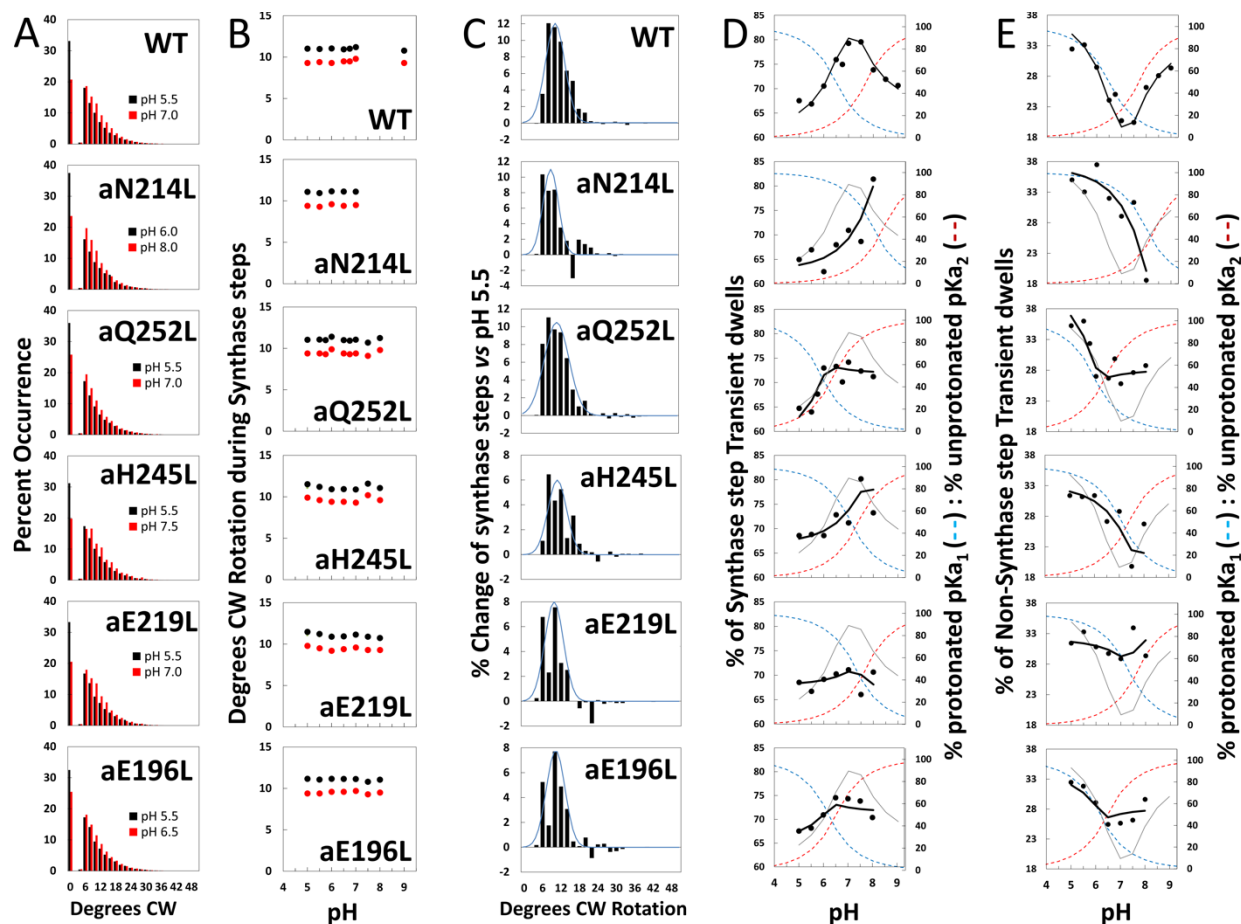

**Fig. 4. Effects of subunit-a mutations on the pH dependence of the extent of CW synthase step rotation, and fraction of TDs containing synthase steps.** **A** Distributions of the extent of CW rotation in the ATP synthesis direction during transient dwells for WT and subunit-a mutants at the low (black) and high (red) pH values indicated. **B** Mean (●) and median (●) extents of CW rotation during a synthase step vs pH. **C** Distributions of the difference in extent of CW synthase step rotation between pH values in Fig 2D when the percent of synthase steps was maximum vs. minimum where (—) is the Gaussian fit. **D** Percent of TDs containing CW synthase steps vs pH, where the data were fit to *Eq. 3* (—). The fraction of protonated groups with  $pK_{a1}$  (---), and unprotonated groups with  $pK_{a2}$  (---) vs pH was calculated from the  $pK_a$  values of Table 2. **E** Percent of TDs that lack synthase steps vs pH where the probability of forming a TD without a synthase step (—) was determined by *Eq. 2* from the fraction of protonated groups with  $pK_{a1}$  (---), and unprotonated groups with  $pK_{a2}$  (---) vs pH calculated using  $pK_a$  values from Table 2.



251

252 subunit-a mutants (**Fig 4E**) to *Eq. 3*, where the probability of forming a TD without a synthase  
253 step ( $T_N$ ) is the sum of the probability ( $P_1$ ) of the protonated group(s) with  $pK_{a1}$  ( $X_1$ ), and the  
254 probability ( $P_2$ ) of unprotonated group(s) with  $pK_{a2}$  ( $Y_2$ ). Thus, these results support the  
255 conclusion that a TD without a synthase step can result from a  $H^+$  transfer event from the  
256 protonated group with  $pK_{a1}$ , or from a  $H^+$  transfer event to the unprotonated group with  $pK_{a2}$ .

$$257 \quad T_N = P_1(X_1) + P_2(Y_2) \quad \text{Eq. 3}$$

258 Fits of the pH dependence of TDs without synthase steps from *Eq. 3* (—) were based on the  
259  $pK_a$  values (**Fig 4E**), and probabilities summarized in **Table 2**. The WT data fit to probabilities of  
260 38% and 33% for protonated groups ( $pK_{a1}$  6.6), and unprotonated groups ( $pK_{a2}$  7.7),  
261 respectively, such that the difference between the  $pK_a$  values was 1.2 pH units. Consequently,  $T_N$

262 **Table 2.  $pK_a$  values and probabilities of forming TDs without synthase steps for WT and subunit-a**  
263 **mutants.** Values were derived from the fits of the data of Fig 4C to *Eq. 2*.

|        | $pK_{a1}$ | $P_1$ (%) | $pK_{a2}$ | $P_2$ |
|--------|-----------|-----------|-----------|-------|
| WT     | 6.5       | 38        | 7.7       | 33    |
| aN214L | 8.0       | 37        | 8.4       | 5     |
| aQ252L | 5.9       | 42        | 6.4       | 28    |
| aE219L | 7.1       | 32        | 7.4       | 35    |
| aH245L | 7.3       | 33        | 7.7       | 22    |
| aE196L | 6.2       | 34        | 6.5       | 28    |

264

265 showed a minimum at  $\sim$ pH 7.3, and maxima at high and low pH values when only the group(s)  
266 with either  $pK_{a1}$  or  $pK_{a2}$  were protonated and unprotonated, respectively.

267 As a result of the subunit-a mutations,  $P_1$  values changed to a smaller extent (32% - 42%) than  
268 did  $P_2$  values (5%-35%). Except for aE219L, all mutations decreased  $P_2$ , including a >6-fold  
269 decrease with aN214L. The difference between  $pK_a$  values observed with the mutants was from  
270 0.3 to 0.5 pH units compared to the 1.2 pH unit difference of WT. Both  $pK_{a1}$  and  $pK_{a2}$  of aN214L  
271 increased by 1.5 and 0.7 pH units such that the minimum  $T_N$  of  $\sim$ 18 % at pH 8.0 represented an  
272 increase of 0.7 pH units from that of WT. At pH 5.5,  $T_N$ 's comprised 38% of all TDs in aN214L.  
273 A similar but smaller shift of the minimum  $T_N$  occurrence to pH 7.5 was also observed for  
274 aH245L, which primarily resulted from an increase in of  $pK_{a1}$  by 0.8 pH units from WT. A  
275 striking effect of mutations aQ252L, aE219L, and aE196L was that they suppressed the pH  
276 dependence of synthase step formation. Of these, aE219L was most where  $T_S$  varied between  
277 66% and 71% of TDs over the pH range examined.

278 In all cases, the occurrence of synthase steps reached a maximum at the crossover point  
279 between the fractions of protonated groups with  $pK_{a1}$  and unprotonated groups with  $pK_{a2}$ . This is  
280 the point at which the largest fractions of both groups were in the correct protonation state where  
281  $H^+$  transfer events could occur from the  $pK_{a1}$  groups to the c-ring, and from the c-ring to the  $pK_{a2}$   
282 groups.

## 283 Discussion

284 The results presented here reveal that  $F_1F_0$  generates pH dependent  $11^\circ$  CW rotational ATP  
285 synthase sub-steps of the c-ring relative to subunit-a that can occur against the force of  $F_1$ ATPase-  
286 dependent CCW rotation at saturating ATP concentrations. Subunit-a residues most closely linked  
287 to these  $H^+$  transfer-dependent rotational steps are aN214/aQ252 in the input channel, and

aE196/aS199 in the output channel based on results presented here that include: (i) that synthase steps, which occur in at least 67% of all TDs, are dependent on a group of residues with an average pKa of 6.5 that must be protonated, and a second group with an average pKa of 7.7 that must be unprotonated; (ii) the probability of forming an ATP synthase step reaches a maximum of 80% of TDs at pH 7.5 when the fractions of protonated groups and unprotonated groups with low and high pKa values are optimal; and (iii) mutating subunit-a residues in either the input or output half-channels alters both pKa values, and can decrease the fraction of TDs that exhibit synthase steps. Based on these results, we conclude (**Fig 5A** → **5B**) that the 11° ATP synthase steps result from a H<sup>+</sup> transfer event from the input channel residues aN214/aQ252 to the leading cD61 (pink), and a H<sup>+</sup> transfer event from the lagging cD61 (orange) to output residues aE196/aS199.

A mechanism where F<sub>0</sub> uses alternating 11° (**Fig 5A** → **5B**), and 25° (**Fig 5B** → **5C**) sub-steps to power c-ring rotation that drives ATP synthesis is consistent with the data presented here, and with F<sub>1</sub>F<sub>0</sub> structures. The pH-dependent 11° sub-step occurs upon H<sup>+</sup> transfer from water

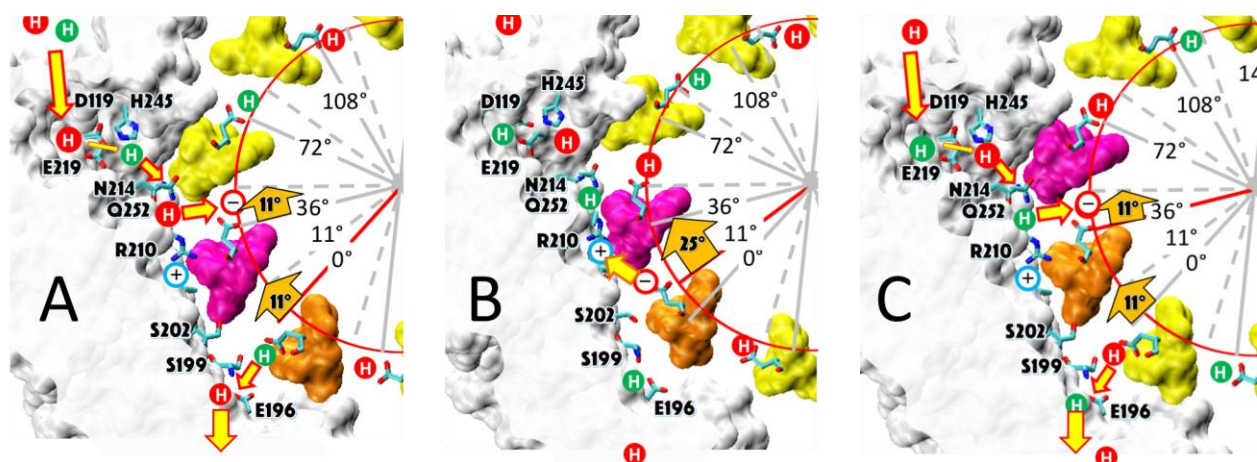

**Fig. 5. Alternating 11° and 25° sub-steps power F<sub>0</sub> c-ring CW rotation in the ATP synthase direction.** **A** The pH-dependent 11° sub-step occurs when H<sup>+</sup> transfer from aN214/aQ25-bound water to the unprotonated leading cD61-carboxyl (pink), and from the protonated lagging cD61-carboxyl (orange) to aS199/aE196-bound water. Rotation results as the negatively charged lagging cD61 (orange) moves in response to the decrease in hydrophobicity from the lipid bilayer to that of the subunit-a interface. This decreases the distance between the lagging cD61 carboxyl and the aR210-guanidinium from ~11.5 Å to ~7.5 Å. **B** The 25° sub-step occurs from the electrostatic interaction between the lagging cD61 carboxy (orange) and the aR210 guanidinium. **C** The electrostatic attraction decreases the distance between orange cD61 and aR210 from ~7.5 Å to ~3.5 Å to complete a 36° stepwise rotation of the c-ring, and positions the orange cD61 to become the leading carboxyl for the next pH-dependent 11° sub-step. The *E. coli* F<sub>1</sub>F<sub>0</sub> cryo-EM structures of rotary sub-states pdb-IDs 5OQS (**A** and **C**), and 5OQR (**B**) are shown as cross-sections of subunit-a (white), and the c-ring as viewed from the periplasm.

bound to aN214 and aQ252 residues to the unprotonated leading cD61-carboxyl (pink), and from the protonated lagging cD61-carboxyl (orange) to the aS199 and aE196-bound water (**Fig 5A**). Rotation results as the negatively charged lagging cD61 moves from the lipid bilayer in response to the decrease in hydrophobicity at the interface with subunit-a, which contains polar groups above (aS202 and aS206) and below (aK203 and aY263) the plane of cD61 rotation (**Fig 5B**, and **Fig 6A**). The 11° sub-step decreases the distance between the lagging cD61 carboxyl and the aR210-guanidinium from ~11.5 Å to ~7.5 Å (**Fig 5B**), where we postulate that the electrostatic attraction between them becomes sufficient to induce the 25° sub-step. As the result of this sub-

step, the distance between these groups decreases from 7.5 Å to 3.5 Å (**Fig 5C**). The loss of negative charge when the lagging cD61-carboxy is protonated by aN214 and aQ252 then allows this c-subunit to rotate away from aR210 into the lipid bilayer as the 11° sub-step repeats.

The alternating 11° and 25° sub-step mechanism proposed here is consistent with *E. coli* F<sub>1</sub>F<sub>0</sub> structures pdb-IDs 6OQR and 6OQS (17), which were used to illustrate Fig 5B and 5C, respectively. Although subunit-γ is docked to the leading c-subunit (pink) in both structures, the rotary position of the c-ring Fig 5C is 25° CW from that of Fig 5B. With a c<sub>10</sub>-ring, the cD61-carboxyls are positioned every 36°, consistent with the spacing between transient dwells observed here. Consequently, rotary positions of the cD61-carboxyls in Fig 5A and 5C are equivalent, except that we have labelled the leading cD61 in the former as the lagging cD61 in Fig 5C to demonstrate the 11° difference between Fig 5A and 5B.

Consistent with the pH-dependence of the 11° synthases steps observed here, the positions of the leading and lagging cD61-carboxyls to the subunit-a input and output residues in structure PDB-ID 5OQR (**Fig 5A**) suggest that they are poised to undergo H<sup>+</sup> translocation events. Notably, the lagging cD61-carboxyl (orange) is ~3.5 Å from the aS199-hydroxyl, which is close enough to form a hydrogen bond to the protonated carboxyl group. The negatively charged leading cD61-carboxyl (pink) is ~3.8 Å from the aR210-guanidinium, which suggests that they have formed a salt bridge. However, the carboxyl is proximal to aN214/aQ25 where protonation would be most effective in allowing it to rotate CW. The F<sub>0</sub> conformation after H<sup>+</sup> translocation is consistent with structure 6OQR (**Fig 5B**) where the c-ring has rotated 11° CW relative to subunit-a (17). Post H<sup>+</sup> transfer, the aR210-guanidinium is now 5.1 Å away from the leading cD61 carboxyl (pink), which suggests that the carboxyl has been protonated. The lagging cD61-carboxyl (orange) is now 8.6 Å away from aS199, and its distance to the aR210-guanidinium has decreased from ~11.5 Å in Fig 5A to ~7.5 Å (**Fig 5B**). At this distance, and with the reduced polarity in the membrane, the electrostatic interaction between the unprotonated cD61 and the guanidinium group would be substantial. We postulate that this interaction is sufficient to power the 25° CW rotational sub-step to reset the conformation to that of structure PDB-ID 6OQS (**Fig 5C**).

The mechanism proposed here is also consistent with structures of the c-ring determined as a function of pH (23). These show the pH-dependent interconversion of the cD61 carboxyl between a protonated locked or closed conformation in subunit-c in a hydrophobic environment, and an unprotonated open, conformation in a more polar environment. Molecular dynamic simulations of these c-ring structures (23) found that it is energetically favorable for the unprotonated cD61 of the c-ring to form an ion pair with a nearby arginine bound to a peptide that was modeled in a lipid environment.

The rotational sub-state structures of *E. coli* F<sub>1</sub>F<sub>0</sub> that differ by the 25° rotation of the c-ring relative to subunit-a were obtained when the complex was inhibited by ADP (17). Similar 11°, and 25° rotational sub-states have also been observed with ADP-inhibited F<sub>1</sub>F<sub>0</sub> *B. taurus* (15), and *M. smegmatis* (24). In *M. smegmatis* F<sub>1</sub>F<sub>0</sub>, the binding of bedaquiline stabilizes a rotational sub-state that is either 25° CW, or 8° CCW from the equivalent rotational state in the absence of the drug (24). The rotational position of the c-ring in the cryo-EM structure of *S. cerevisiae* F<sub>1</sub>F<sub>0</sub> is also changed by ~9° when the inhibitor oligomycin is bound to F<sub>0</sub> (25).

The low, medium, and high efficiencies of TD formation reported here (**Fig 2B**) were attributed to torsional strain resulting from the asymmetry between 36° c<sub>10</sub>-ring stepping, and the

367 120° F<sub>1</sub> power strokes (8). Based on this asymmetry observed in low resolution ADP-inhibited  
368 F<sub>1</sub>F<sub>0</sub> structures (26), high efficiency TD formation was proposed to occur (27) in the rotary state  
369 comparable to that in which rotary sub-state structures PDB-IDs 6OQR and 6OQS were  
370 subsequently observed at 3.1 Å resolution (17). Sobti *et al.* (17) concurred that torsional strain  
371 contributed to their ability to resolve the 6OQR and 6OQS sub-state structures. However, in  
372 results presented here, catalytically active F<sub>1</sub>F<sub>0</sub> in lipid bilayer nanodiscs show successive 11°  
373 ATP synthase steps every 36° including at the rotary position of the ATPase power stroke where  
374 ADP inhibits rotation (**Fig 2A**, - - -). Because ATP synthase steps can also occur with low  
375 efficiency when torsional strain decreases the probability of forming a synthase step, it is clear  
376 that torsional strain is not the primary contributing factor to the ability of F<sub>0</sub> to undergo 11° ATP  
377 synthase steps.

378 The data presented here are consistent with a Grothuss proton translocation mechanism  
379 through the two subunit-a half channels connected by the proton transfer events to and from the c-  
380 ring. In a Grothuss mechanism (28), a chain of water molecules that is H<sup>+</sup>-bonded to specific  
381 protein groups, enables transfer of protonic charge over long distances via rapid exchange of H<sup>+</sup>  
382 between H<sub>3</sub>O and H<sub>2</sub>O. This type of proton transfer is supported, first, by the fact that the  
383 mutations of all residues investigated here caused significant changes in the ability to form TDs,  
384 including the pH dependence of TD formation, and the ability to form 11° CW synthase steps in  
385 particular. This indicates that these groups all participate in the H<sup>+</sup> transfer process. In addition,  
386 none of the mutations completely eliminated the pH dependent 11° ATP synthase steps,  
387 consistent with the requirement that a Grothuss-type water column must be supported by multiple  
388 H-bond partners to enable H<sup>+</sup> translocation (28,29).

389 Second, in structure 6OQS (17), the putatively protonated cD61-carboxyl comes within 3.5 Å  
390 of the polar aS199-hydroxyl, which is incapable of accepting a proton by itself. However, the 4.6  
391 Å distance between aS199 and aE196 is consistent with the presence of an intervening water such  
392 that deprotonation of cD61 would be able to generate a hydronium ion that would immediately  
393 protonate the aE196-carboxyl. Similarly, residues aN214 and aQ252 at the input channel:c-ring  
394 interface are not ionizable, and thus are unable to directly protonate cD61. However, these polar  
395 sidechains may protonate cD61 if their role is to provide H-bonds to a Grothuss water column.  
396 The other input channel residues aH245, aE119, and aE219 are all separated by distances of 4 Å  
397 to 7 Å that can stabilize a Grothuss water column. It is noteworthy that the path between these  
398 residues includes backbone carbonyls that can also contribute to the stabilization of a H<sup>+</sup>  
399 translocating water column. Although a potential path for the output channel between aE196, and  
400 the cytoplasm has not been identified, aQ181, aE177, and the subunit-a C-terminal carboxyl  
401 group span this distance at ~4 Å intervals (17), consistent with that needed to stabilize a Grothuss  
402 water channel in the *E. coli* enzyme. However, more work is required to characterize this channel,  
403 especially since aE196 and aS199 are the only output channel residues conserved among other  
404 species.

405 Third, the data presented here show that the high and low pKa values correspond to the H<sup>+</sup>-  
406 transfer events from the input channel to the c-ring, and from the c-ring to the output channel,  
407 respectively. However, mutation of a residue in either half-channel alters both pKa's. The good fit  
408 of the occurrence of ATP synthase steps with the proportion of groups with high and low pKa  
409 values in the correct protonation state, supports the conclusion that synthase steps occur when H<sup>+</sup>-  
410 transfer occurs between the c-ring and both half channels. Conversely, H<sup>+</sup>-transfer events between  
411 the c-ring one of the half channels result in TDs that lack a synthase step. As the result of an 11°

412 CW synthase step, a periplasmic proton entering the input channel Grotthuss water column would  
413 result in the immediate release of a proton from the output channel Grotthuss column into the  
414 cytoplasm. It is noteworthy that ATPase-driven CCW rotation pumps protons in the opposite  
415 direction from that which occurs during ATP synthesis. Although this process is reversible, the  
416 results presented here that showed that ATP synthase steps increased with aQ252L and especially  
417 aN214L, decreased the efficiency of H<sup>+</sup>-transfer in the ATPase direction relative to the ATP  
418 synthase direction.

419 Fourth, H<sup>+</sup>-specific conductance through F<sub>O</sub> from *Rhodobacter capsulatus* was observed to  
420 increase linearly with the size of a transmembrane voltage jump from 7 to 70 mV (30). A  
421 conductance of ~10 fS, equivalent to a proton translocation rate of 6240 H<sup>+</sup> s<sup>-1</sup> was observed at  
422 100 mV driving force. Such high rates of H<sup>+</sup> translocation support a Grotthuss mechanism, and  
423 are so fast that the ability to supply protons to the Grotthuss water column becomes a rate-limiting  
424 factor (29). The rate clearly exceeds the rate of delivery of protons by free diffusion from the bulk  
425 aqueous solution at a concentration of 10<sup>-8</sup> M (pH 8). To achieve this rate of H<sup>+</sup> translocation, the  
426 existence of a proton antenna at the distal end of the F<sub>O</sub> input channel has been postulated (29),  
427 which in *R. capsulatus* was calculated to consist of a hemispherical Coulomb cage with a H<sup>+</sup>  
428 capture radius of ~40 Å surrounding the entrance to the input channel (29). The Coulomb cage  
429 would need to contain unprotonated carboxylate residues with a pK<sub>a</sub> ≅ 5. It is noteworthy that the  
430 pK<sub>a</sub> values estimated for *R. capsulatus* F<sub>O</sub> (28) are comparable to those reported here for the  
431 groups that must be protonated to induce TDs.

432 In fact, *E. coli* F<sub>1</sub>F<sub>O</sub> subunit-a (17) has a funnel shaped vestibule (**Fig 6**). The funnel diameter is  
433 ~30 Å at its widest as defined by surface polar groups, and is lined with several carboxylate and

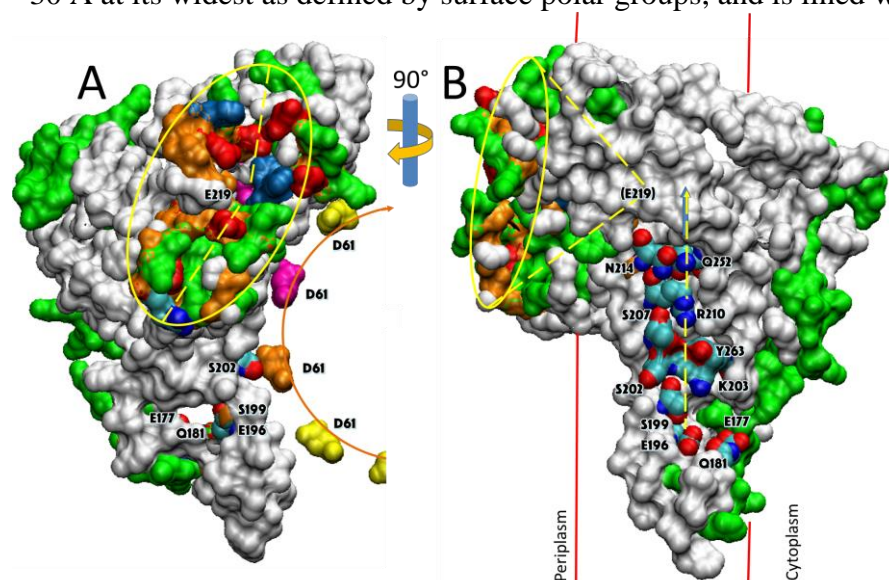

434 **Fig. 6. Aqueous vestibule of charged and polar groups can serve as an antenna to funnel protons to the**  
435 **input channel. A** Periplasmic surface of subunits-a and b showing the aqueous vestibule (yellow oval) that can  
436 **input channel.** serve to funnel protons to aE219 (pink). The funnel surface is defined by asp and glu groups (red), his groups  
437 (blue), polar residues (green), and backbone residues of loop regions (orange). Hydrophobic residues are white.  
438 The cD61 carboxyl groups that interface subunit-a are indicated yellow, orange and pink. **B** Surface of subunits-  
439 a and b that interfaces the c-ring from structure pdb-ID 5OQR showing approximate position of the aqueous  
440 funnel terminating at aE219 (buried), and residues involved in proton translocation. The plane of cD61 residues  
441 and the direction of rotation in the ATP synthase direction is indicated by (- - ->).  
442

443

imidazole residues as the funnel narrows, culminating at its apex with the aE219-carboxyl examined here, which we propose to be at the start of the Grotthuss column. A recent cryo-EM structure of the  $V_O$  complex (31) was of sufficient resolution to resolve a column of water in the proton translocation channels of subunit-a of this related proton pumping rotary ATPase. Unidentified electron densities have also been identified near input channel residues in subunit-a in  $F_1F_0$  structures from *E. coli* (17), and from *Polytomella* (32) that may indicate the presence of bound waters.

## Materials and Methods

### *Mutagenesis and Purification of n-F<sub>0</sub>F<sub>1</sub>*

The *E. coli*  $F_0F_1$  samples were expressed from the pNY<sub>1</sub>-Ase plasmid construct with 6-His tag on the N-terminus of subunit- $\beta$ , and a cysteine inserted at the second position of subunit-c (c2V<sub>Cys</sub>) described previously by Ishmukhametov *et al.* (9). The aN214L, aQ252L, aH245L, aE219L, and aE196L point mutations were generated by site-directed mutagenesis. XL10-Gold Ultracompetent *E. coli* cells (Agilent) were transformed with the plasmid, the  $F_0F_1$  complex was purified by detergent solubilization and Ni-NTA affinity chromatography, biotinylated, and incorporated into lipid nanodisc as previously described (8).

### *Gold-Nanorod Single Molecule Experiments*

Rotation of individual n- $F_0F_1$  molecules were observed by single-molecule rotation assay. Sample slides were prepared with modifications of previously described methods (8,9). Briefly, purified n- $F_0F_1$  were immobilized on a microscope slide by the His-tag on subunit- $\beta$ , unbound enzymes were washed off the slide with wash buffer (30 mM Tris, 30mM PIPES, 10 mM KCl, at the appropriate pH), 80 × 40 nm AuNR coated with avidin was bound to the biotinylated c-ring of *E. coli* n- $F_0F_1$ , excess AuNRs were washed off with the wash buffer, and rotation buffer (1 mM Mg<sup>2+</sup> ATP, 30 mM Tris, 30mM PIPES, 10 mM KCl, at the pH indicated) was added to the slide. The rotation of individual molecules was observed by measuring the change in intensity of polarized red light scattered from the AuNR using a single-photon detector. In each molecule observed, the rotation of the nanorod attached to an active n- $F_0F_1$  complex was confirmed by the change in the dynamic range of the scattered light intensity as a function of the rotational positions of the polarizing filter as described previously (18,19). To make the measurement of n- $F_0F_1$  undergoing power strokes, the orientation of the polarizing filter was adjusted to align with the minimum light intensity position that that corresponded to one of the three catalytic dwells. The sinusoidal change of polarized red light intensity was measured as the AuNR rotated from 0° to 90° relative to the catalytic dwell position. Measurements were taken in the form of 5 s dataset at frame rate of 100 kHz. The occurrence of transient dwells in each subunit-a mutant was analyzed at varying pH from 5.0 to 8.0. Transient dwells that occurred during the power strokes in the recorded data sets were analyzed using custom software developed in MATLAB R2103b (10, 33).

## Acknowledgments

This work was funded by NIH grant R01GM097510 to WDF.

## Competing Interests

The authors declare that they have no competing interests. All data needed to evaluate the conclusions in the paper are present in the paper and/or the Supplementary Materials.

## References

1. D. Spetzler, R. Ishmukhametov, T. Hornung, J. Martin, J. York, L. Jin-Day, W. D. Frasch, [Energy transduction by the two molecular motors of the F<sub>1</sub>F<sub>0</sub> ATP synthase.] in *Photosynthesis: Plastid Biology, Energy Conversion and Carbon Assimilation, Advances in Photosynthesis and Respiration* (Springer, Dordrecht, 2012), pp. 561-583.
2. W. Kühlbrandt, Structure and mechanisms of F-type ATP synthases. *Ann. Rev. Biochemistry*. **88**, 515-549 (2019).
3. J. Martin, R. Ishmukhametov, T. Hornung, Z. Ahmad, W. D. Frasch, Anatomy of F<sub>1</sub>-ATPase powered rotation. *Proc. Natl. Acad. Sci. USA*. **111**, 3715-3720 (2014).
4. R. Yasuda, H. Noji, M. Yoshida, K. Kinoshita, H. Itoh, Resolution of distinct rotational substeps by submillisecond kinetic analysis of F<sub>1</sub>-ATPase. *Nature*. **410**, 898-904 (2001).
5. D. Spetzler, R. Ishmukhametov, L. Jin-Day, T. Hornung, J. Martin, & W. D. Frasch, Single molecule measurements reveal an interdependence between the power stroke and the dwell duration. *Biochemistry*. **48**, 7979-7985 (2009).
6. S. Fischer, P. Gräber, P. Turina, The activity of the ATP synthase from *Escherichia coli* is regulated by the transmembrane proton motive force. *J. Biol. Chem.* **39**, 30157-30162 (2000).
7. S. Steigmiller, P. Turina, P. Gräber, The thermodynamic H<sup>+</sup>/ATP ratios of the H<sup>+</sup>-ATP synthases from chloroplasts and *Escherichia coli*. *Proc. Natl. Acad. Sci. USA*. **105**, 3745-3750 (2008).
8. S. Yanagisawa, W. D. Frasch, Protonation-dependent stepped rotation of the F-type ATP synthase c-ring observed by single-molecule measurements. *J. Biol. Chem.* **292**, 17093-17100 (2017).
9. R. Ishmukhametov, T. Hornung, D. Spetzler, W. D. Frasch, Direct observation of stepped proteolipid ring rotation in *E. coli* F<sub>0</sub>F<sub>1</sub> ATP synthase. *EMBO J.* **29**, 3911-3923 (2010).
10. J. Martin, J. Hudson, T. Hornung, W. D. Frasch, F<sub>0</sub>-driven rotation in the ATP synthase direction against the force of F<sub>1</sub> ATPase in the F<sub>0</sub>F<sub>1</sub> ATP synthase. *J. Biol. Chem.* **290**, 10717-10728 (2015).
11. B. Cain, R. Simoni, Proton translocation by the F<sub>1</sub>F<sub>0</sub> ATPase of *Escherichia coli*. Mutagenic analysis of the a subunit. *J. Biol. Chem.* **264**, 3292-3300 (1989).
12. B. Cain, R. Simoni, Interaction between glu-219 and his-245 within the a subunit of F<sub>1</sub>F<sub>0</sub>-ATPase in *Escherichia coli*. *J. Biol. Chem.* **263**, 6606-6612 (1989).
13. S. Vik, B. Cain, K. Chun, R. Simoni, Mutagenesis of the a subunit of the F<sub>1</sub>F<sub>0</sub>-ATPase from *Escherichia coli*. Mutations at glu-196, pro-190, and ser-199. *J. Biol. Chem.* **263**, 6599-6605 (1988).
14. A. Hahn, J. Vonck, D. Mills, T. Meier, W. Kühlbrandt, Structure, mechanism, and regulation of the chloroplast ATP synthase. *Science*. **360**, eaat4318 (2018).
15. A. Zhou, A. Rohou, D. G. Schep, J. V. Bason, M. G. Montgomery, J. E. Walker, N. Grigorieff, J. L. Rubinstein, Structure and conformational states of the bovine mitochondrial ATP synthase by cryo-EM. *eLife*. **4**, e10180 (2015).
16. Pinke, G., Zhou, L. & Sazanov, L. Cryo-EM structure of the entire mammalian F-type ATP synthase. *Nat Struct Molec Bio.* **27**, 1077-1085 (2020).
17. M. Sobti, J. Walshe, D. Wu, R. Ishmukhametov, Y. C. Zeng, C. V. Robinson, R. M. Berry, A. G. Stewart, Cryo-EM structures provide insight into how *E. coli* F<sub>1</sub>F<sub>0</sub> ATP synthase accommodates symmetry mismatch. *Nat. Comm.* **11**, 2615 (2020).
18. D. Spetzler, J. York, D. Lowry, D. Daniel, R. Fromme, W. D. Frasch, Microsecond time scale rotation measurements of single F<sub>1</sub>-ATPase molecules. *Biochemistry*. **45**, 3117-3124 (2006).

- 537 19. T. Hornung, J. Martin, D. Spetzler, R. Ishmukhametov, W. D. Frasch, Microsecond  
538 resolution of single-molecule rotation catalyzed by molecular motors. *Methods in Molecular*  
539 *Biology*. **778**, 273-289 (2011).
- 540 20. P. Ragnathan, H. Sielaff, L. Sundararaman, G. Biukovic, M. Sony, S. Manimekalai, D.  
541 Singh, S. Kundu, T. Wohland, W. D. Frasch, T. Dick, G. Grüber, The uniqueness of subunit  
542  $\alpha$  of mycobacterial F-ATP synthases: An evolutionary variant for niche adaptation. *J. Biol.*  
543 *Chem.* **292**, 11262-11279 (2017).
- 544 21. H. Sielaff, J. Martin, G. Grüber, W. D. Frasch, Power stroke angular velocity profiles of  
545 archaeal A-ATP synthase versus thermophilic and mesophilic F-ATP synthase molecular  
546 motors. *J. Biol. Chem.* **291**, 25351-225363 (2016).
- 547 22. P. Cook, W. W. Cleland, [pH Dependence of Kinetic Parameters and Isotope Effects] in  
548 *Enzyme kinetics and mechanism*, (Garland Science, London, 2007), pp. 325-364.
- 549 23. Pogoryelov, D., A. Krah, J. D. Langer, Ö. Yildiz, J. D. Faraldo-Gómez, T. Meier,  
550 Microscopic rotary mechanism of ion translocation in the F<sub>O</sub> complex of ATP synthases.  
551 *Nature Chemical Biology* **6**, 891-899 (2010).
- 552 24. H. Guo, G. M. Courbon, S. A. Bueler, J. Mai, J. Liu, J. L. Rubinstein, Structure of  
553 mycobacterial ATP synthase bound to the tuberculosis drug bedaquiline. *Nature*. **589**, 143-  
554 147 (2020).
- 555 25. A. P. Srivastava, M. Lou, W. Zhou, J. Symersky, D. Bai, M. G. Chambers, J. D. Faraldo-  
556 Gómez, M. Liao, D. M. Mueller, High-resolution cryo-EM analysis of the yeast ATP  
557 synthase in a lipid membrane. *Science*, eaas9699 (2018).
- 558 26. M. Sobti, C. Smits, A. Wong, R. Ishmukhametov, D. Stock, S. Sandin, A. Stewart, Cryo-  
559 EM structures of the autoinhibited *E. coli* ATP synthase in three rotational states. *eLife*. **5**,  
560 21598 (2016).
- 561 27. H. Sielaff, S. Yanagisawa, W. D. Frasch, W. Junge, M. Börsch, Structural asymmetry and  
562 kinetic limping of single rotary F-ATP synthases. *Molecules*. **24**, 504 (2019).
- 563 28. S. Cukierman, Et tu, Grotthuss! and other unfinished stories. *Biochim. Biophys. Acta*. **1757**,  
564 876-885 (2006).
- 565 29. C. A. Wraight, Chance and design- Proton transfer in water, channels and bioenergetic  
566 proteins. *Biochim. Biophys. Acta*. **1757**, 886-912 (2006).
- 567 30. B. Feniouk, M. Koslova, D. Knorre, D. Cherepanov, A. Mulkidjanian, W. Junge, The  
568 proton-driven rotor of ATP synthase: ohmic conductance (10 fS) and absence of voltage  
569 gating. *Biophys. J.* **86**, 4094-4109 (2004).
- 570 31. S-H. Roh, M. Shekhar, G. Pıntilır, C. Chipot, S. Wilkens, A. Singaroy, W. Chiu, Cryo-EM  
571 and MD infer water-mediated proton transport and autoinhibition of V<sub>O</sub> complex. *Science*  
572 *Advances*. **6**, eabb9605 (2020)
- 573 32. B. J. Murphy, N. Klusch, J. Langer, D.J. Mills, Ö. Yildiz, W. Kühnbrandt, Rotary substates  
574 of mitochondrial ATP synthase reveal the basis of flexible F<sub>1</sub>-F<sub>O</sub> coupling. *Science*. **364**,  
575 caaw9128 (2019).
- 576 33. J. Martin, R. Ishmukhametov, D. Spetzler, T. Hornung, W. D. Frasch, Elastic coupling  
577 power stroke mechanism of the F<sub>1</sub>-ATPase molecular motor. *Proc. Nat. Acad. Sci. USA*.  
578 **115**, 5750-5755 (2018).
- 579  
580  
581  
582  
583



## Supplementary Materials for

### **pH-dependent 11° F<sub>1</sub>F<sub>0</sub> ATP synthase sub-steps reveal insight into the F<sub>0</sub> torque generating mechanism**

Seiga Yanagisawa and Wayne D. Frasch\*

\*Corresponding author. Email: [frasch@asu.edu](mailto:frasch@asu.edu)

598

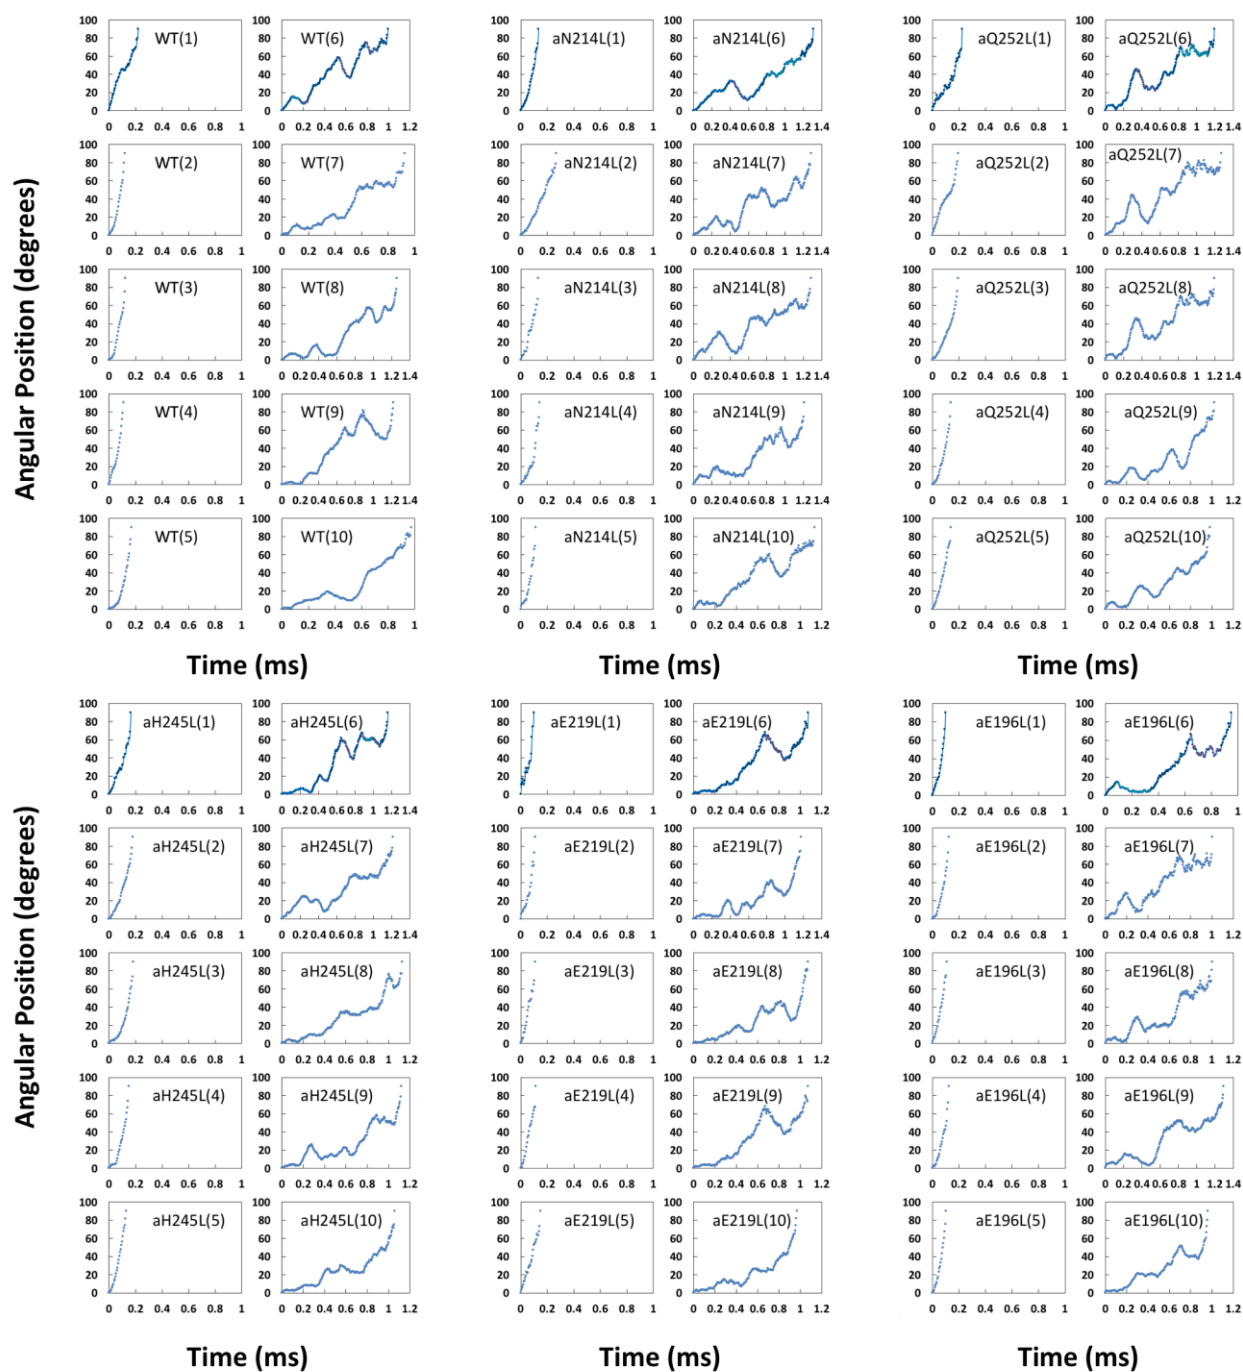

599

600

601 **Fig. S1.** Examples each of the first 90° of ATP hydrolysis-driven power strokes observed using  
 602 F<sub>0</sub>F<sub>1</sub>-nanodiscs. In each mutant, examples 1-5 show power strokes without transient dwells.  
 603 Examples 6-10 show power strokes with transient dwells where the F<sub>0</sub> motor either halts CCW  
 604 rotation, or caused CW rotation in the ATP synthase direction.

605

606

Change in  $K_1$  causes a change in the maximum TD occurrence.

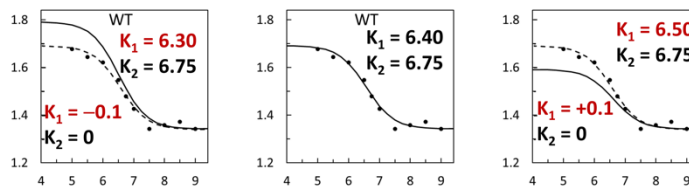

Change in  $K_2$  also changes in the maximum TD occurrence, but in the opposite direction as when  $K_1$  is changed.

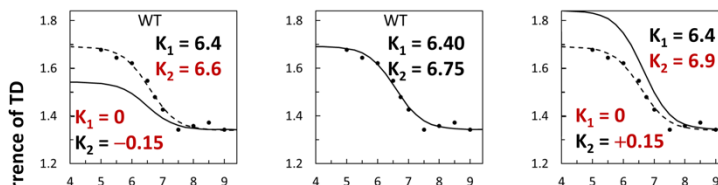

Changing both  $K_1$  and  $K_2$  an equal amount shifts the curve along the x-axis

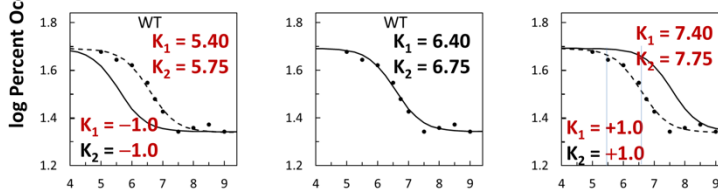

Changing the  $T_{min}$  shifts the curve along the y-axis

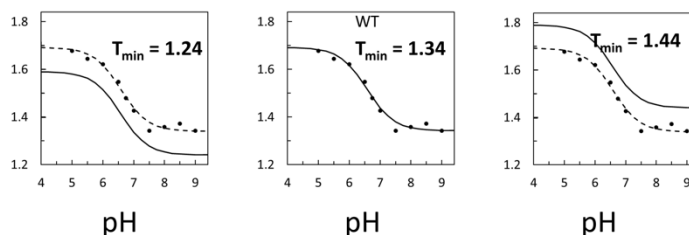

pH

pH

pH

607

608

609

610

**Fig. S2.** Examples of how changes in the variables in *Eq. 1* affect the log-log plots that describe the  $F_1$ -ATPase inhibition kinetics of Fig 2C.

611

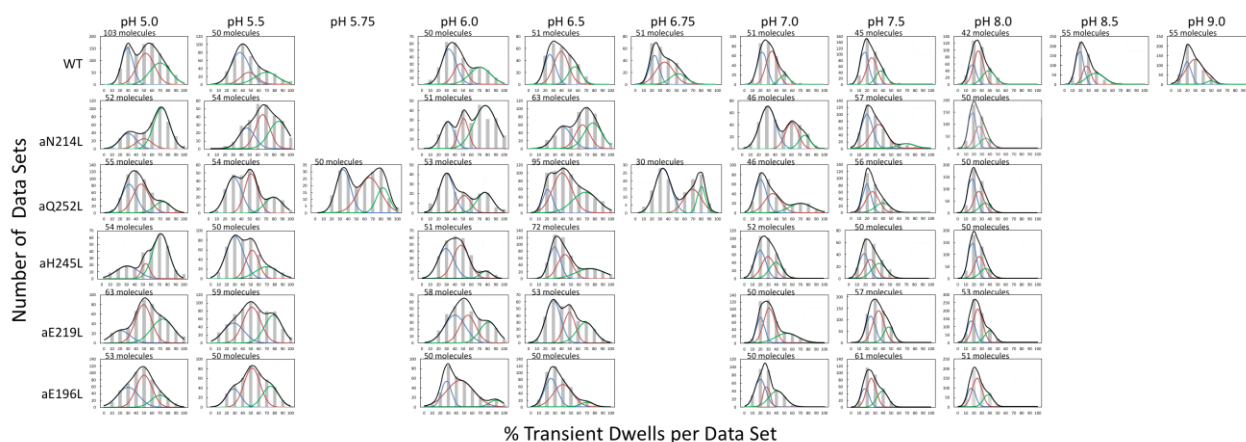

612

613

614

615

616

617

618

**Fig. S3.** Distribution of power stroke data sets (each set containing ~300 power strokes) at each pH examined vs the percentage of the occurrence of TDs per data set binned to each 10 % (gray bars). The data were fit to the sum of three Gaussians (—) representing low (—), medium (—), and high (—) efficiencies of TD formation. Ten data sets were acquired from each molecule, and the number of molecules examined are shown for each condition.

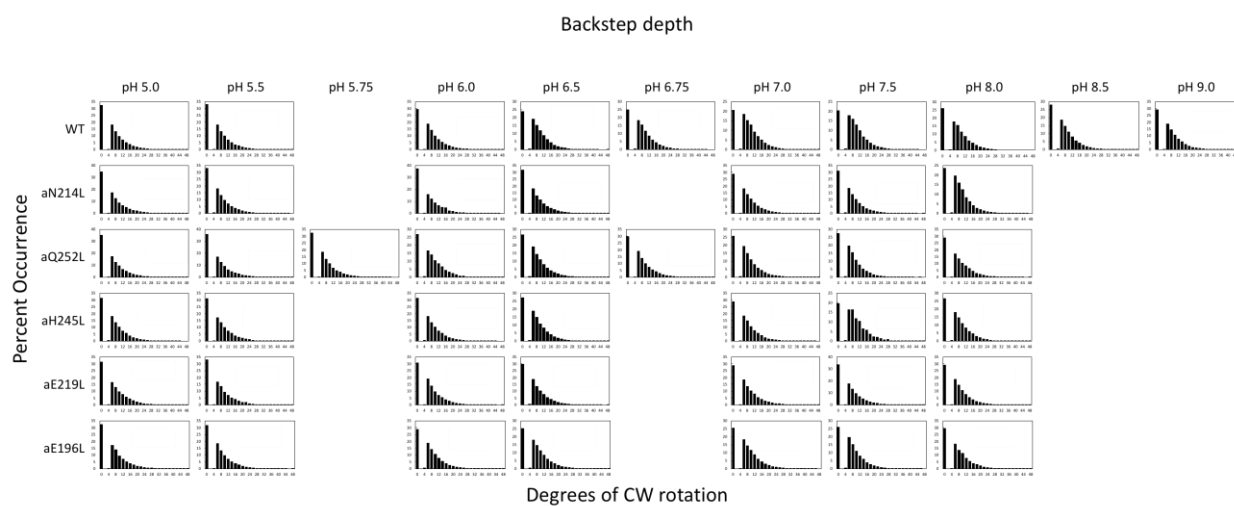

619

620 **Fig. S4.** Distributions of the extent of CW rotation in the ATP synthesis direction during transient  
621 dwells for WT and subunit-a mutants *vs* pH.

622

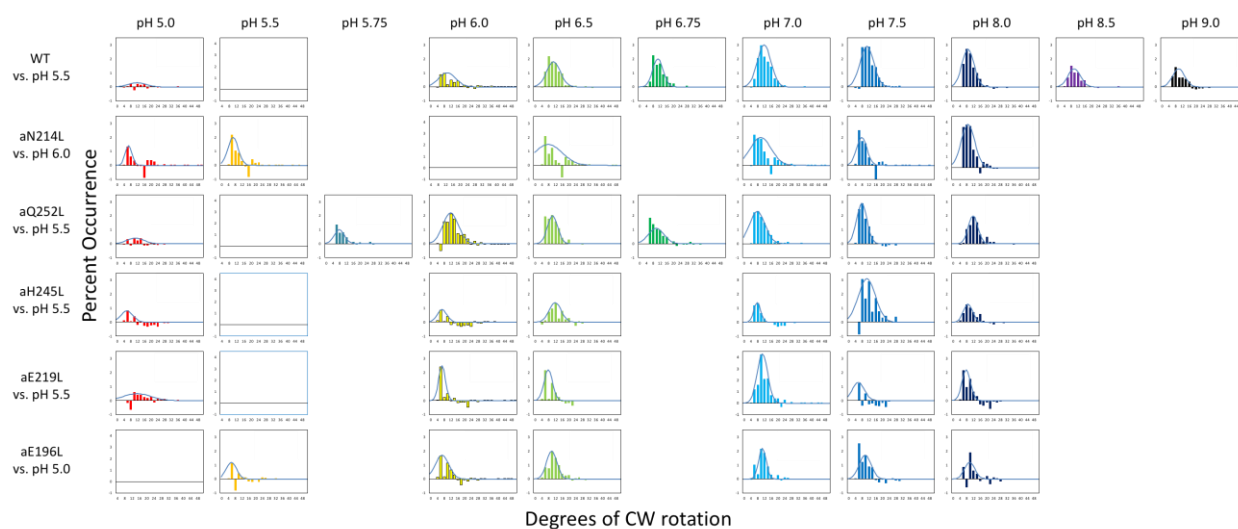

Source: https://www.biorxiv.org/content/10.1101/2021.05.16.444358v1.full.pdf
